# Supplementary material
Source: PubMed Central journal article supplement (PMC1283413)

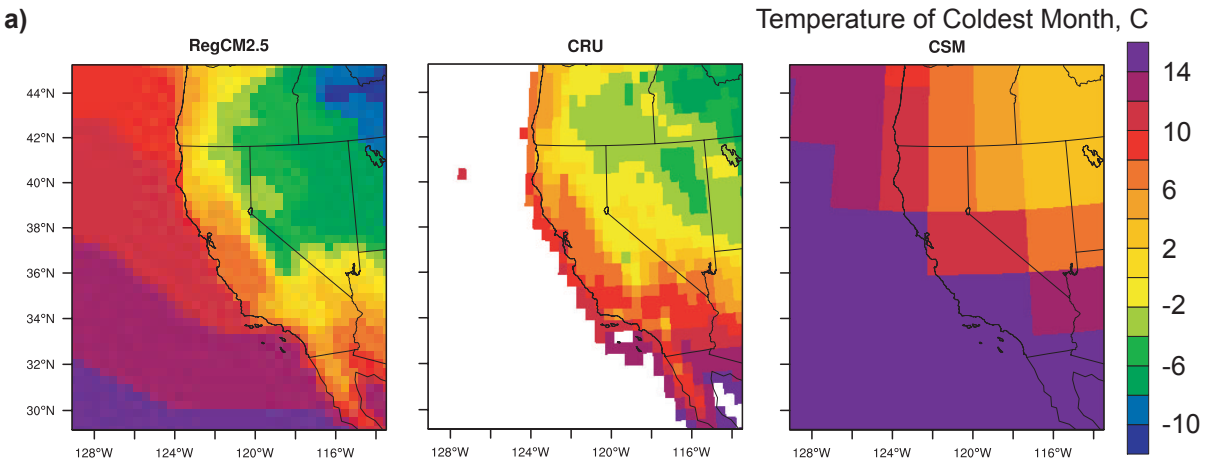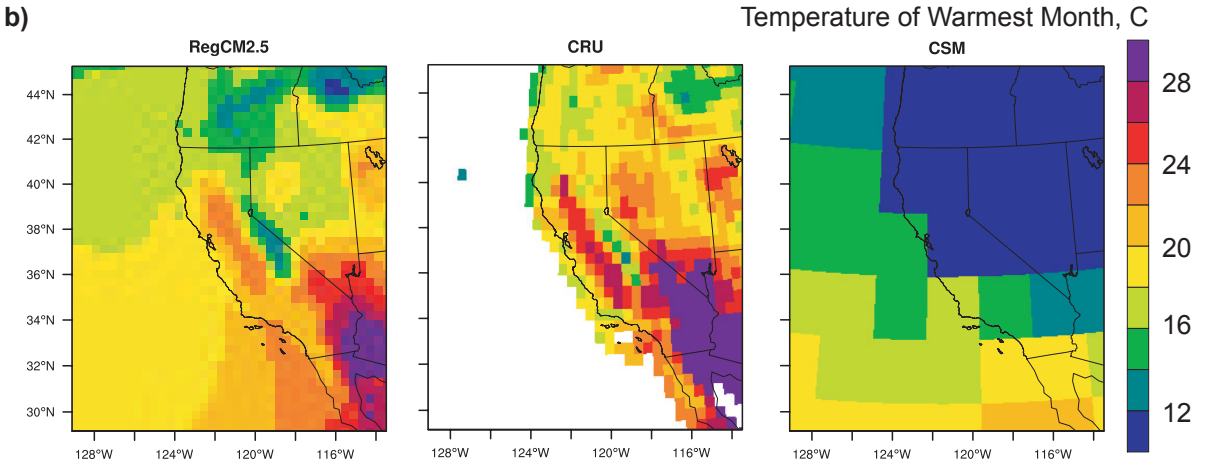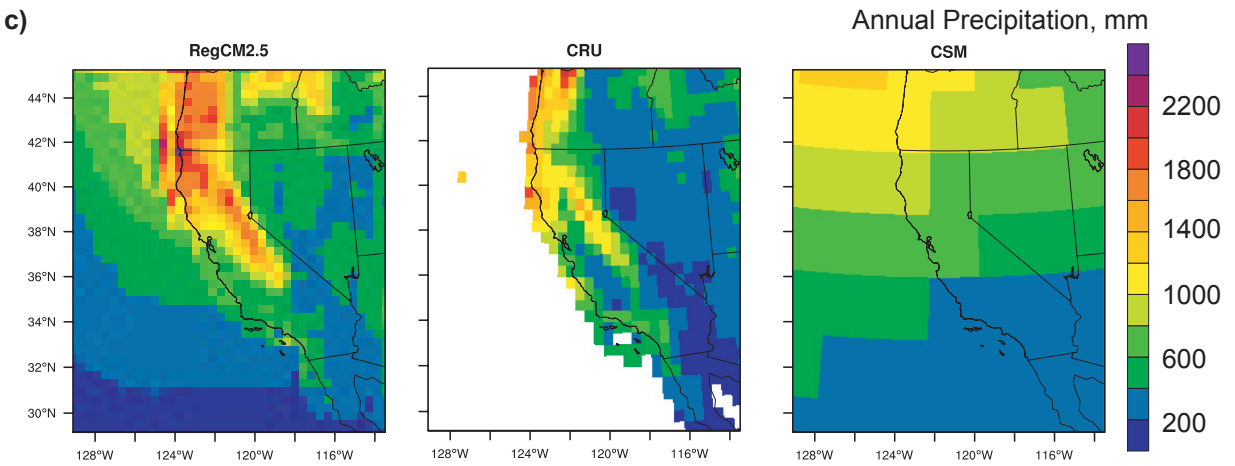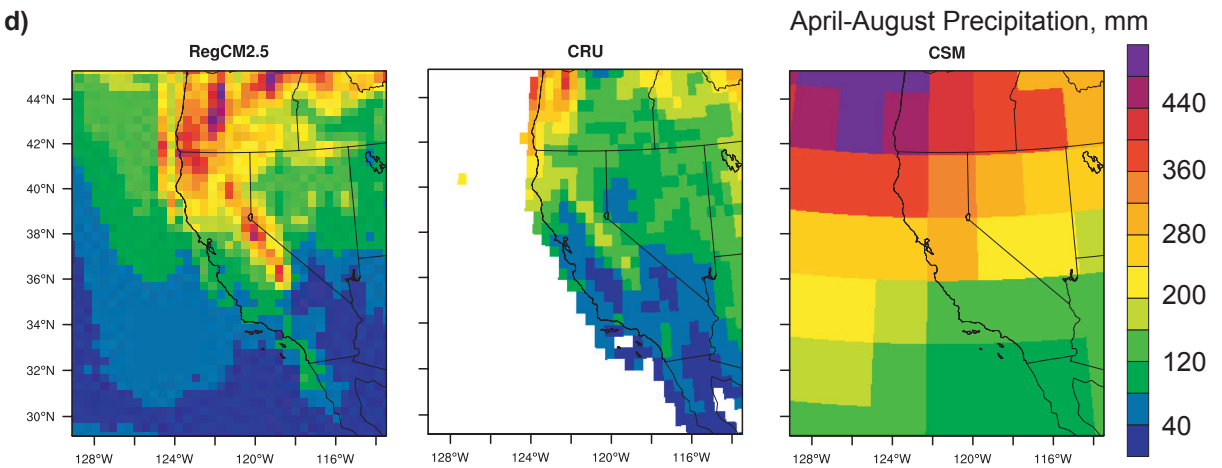

Supplement: pnas_0501427102_1.pdf [file pnas_0501427102_1.pdf]

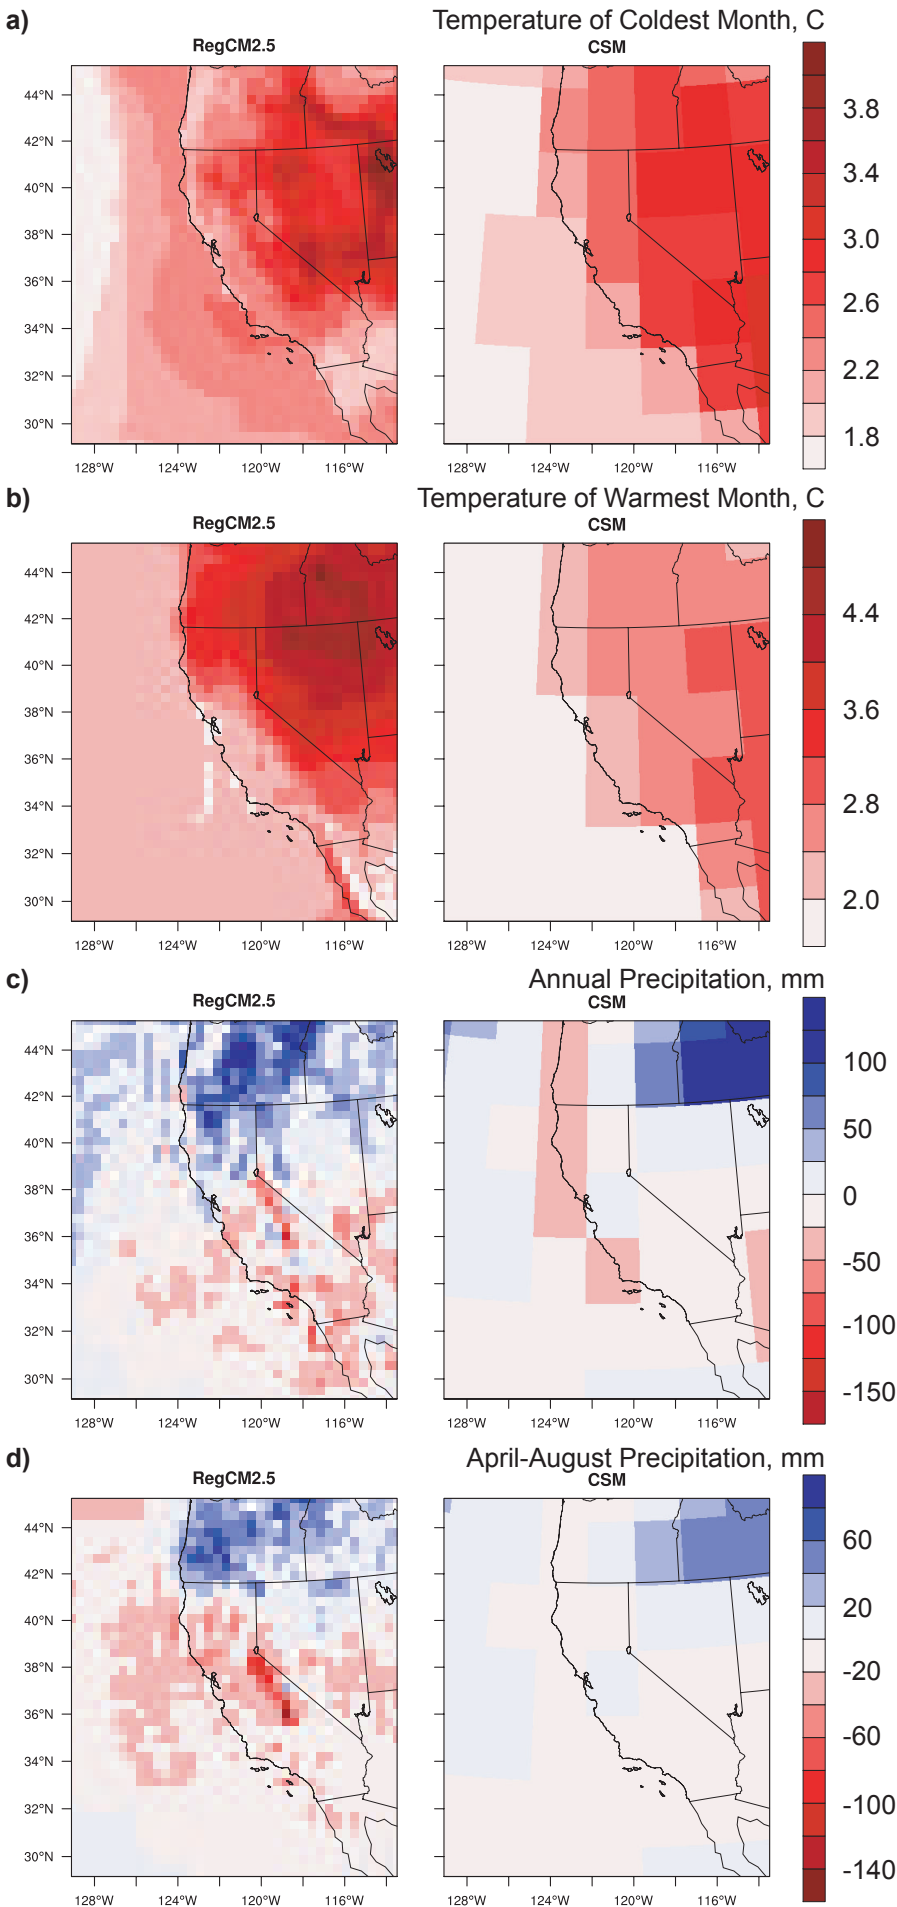

Supplement: pnas_0501427102_2.pdf [file pnas_0501427102_2.pdf]
